# Supplementary material
Source: Elsevier journal article supplement (https://www.sciencedirect.com/science/article/pii/S0365669121000228)
Supplement: mmc1 [file S0365669121000228:mmc1.doc]

**Anexo1. Encuesta telémática**

Dirección de correo electrónico *

Tu dirección de correo electrónico

Acepto ceder los datos de esta encuesta para fines de investigación al GEAS (GRUPO DE ENFERMEDADES AUTOINMUNES SISTÉMICAS) DE LA SOCIEDAD ESPAÑOLA DE MEDICINA INTERNA (SEMI).  *

Sí

No

Enfermedad autoinmune sistémica de la que ha sido diagnosticad@:  *

Lupus eritematoso sistémico

Esclerodermia

Síndrome de Sjögren

Artritis reumatoide

Síndrome antifosfolípido

Conectivopatía indiferenciada (enfermedad indiferenciada del tejido conectivo)

Arteritis de células gigantes (arteritis temporal) o polimialgia reumática

Otras vasculitis

Sarcoidosis

Enfermedad de Behçet

Policondritis recidivante

Uveítis

Otras enfermedades autoinmunes sistémicas

NO padezco ninguna de estas enfermedades

El seguimiento de mi enfermedad autoinmune lo llevan habitualmente en ... (se pueden marcar varias)

Medicina Interna

Reumatología

Dermatología

Nefrología

Atención Primaria

Hematología

Otras consultas...

El hospital o centro médico en el que controlan mi enfermedad autoinmune es...

Tu respuesta

Fecha de nacimiento *

DD **/** MM **/** AAAA

Sexo

Mujer

Varón

Prefiero no contestar esta pregunta

Nacionalidad

Tu respuesta

Ciudad de residencia

Tu respuesta

País de residencia

Tu respuesta

¿Está tomando hidroxicloroquina o cloroquina (dolquine, resochín, plaquenil...) desde hace al menos 14 días? *

Sí

No

NO estoy seguro

Mi dosis habitual de hidroxicloroquina es...

100 mg (1/2 comprimido) al día

200 mg (1 comprimido) al día

300 mg (1 comprimido y 1/2) al día

400 mg (2 comprimidos) al día

1 comprimido a días alternos

1/2 comprimido a días alternos

Otras

Mi dosis diaria habitual de cloroquina en mg es...

Tu respuesta

Fecha de inicio del tratamiento con hidroxiclororoquina o cloroquina (anotar fecha aproximada si no se recuerda bien) *

DD **/** MM **/** AAAA

Además de la hidroxicloroquina o cloroquina, ¿estoy tomando uno o más de los siguientes inmunosupresores en los últimos 6 meses)

Azatioprina (imurel, imuran)

Micofenolato (cellcept, myfortic...)

Tacrolimus (prograf, advagraf, envarsus... )

Ciclosporina (sandimmun)

Metotrexato (metoject, metofill, glofer...)

Leflunomida (arava)

Ciclofosfamida

Otro:

Además de la hidroxicloroquina, ¿me han puesto (en cualquier momento) alguno de los siguientes tratamientos biológicos en los últimos 6 meses?.

Rituximab (mabthera, rituxan, rixaton...)

Belimumab (benlysta)

Tocilizumab (roactemra)

Adalimumab (Humira)

Infliximab (remicade)

Etanercept (embrel)

Anakinra (kineret)

Otro:

... y de corticoides, estoy tomando actualmente

Prednisona

Dacortín

Zamene

Dezacort

Deflazacort

Dexametasona

Fortecortín

Tópicos (pomadas, cremas, emulsiones...)

NO HE TOMADO CORTICOIDES EN EL ÚLTIMO MES

Anota tu dosis media de corticoide en el último mes (por ejemplo.- si tomas 5 mg/d, anota 5 mg; si has tomado 15 días 10 mg y 15 días 5 mg, anota 7.5 mg/d)

1.25 mg/d

2.5 mg/d

4 mg/d

5 mg/d

7.5 mg/d

8 mg/d

10 mg/d

12.5 mg/d

15 mg/d

17.5 mg/d

20 mg/d o más

NO HE TOMADO CORTICOIDES EN EL ÚLTIMO MES

¿En los últimos 14 días ha padecido o padece alguno o varios de los siguientes síntomas? (se pueden marcar varias)

TOS

FIEBRE > 38ºC

FEBRÍCULA (37-38ºc)

DIFICULTAD RESPIRATORIA

ALTERACIONES DEL GUSTO

ALTERACIONES DEL OLFATO (ANOSMIA)

DIARREA

ASTENIA (CANSANCIO GENERAL)

Otro:

Fecha de inicio de síntomas

DD **/** MM **/** AAAA

¿Le han realizado test PCR para Coronavirus COVID-19?

SÍ, me han hecho test PCR para COVID-19

NO, no me lo han hecho

Estoy pendiente de realizármelo o del resultado

El resultado de ese primer test para COVID-19 fue...

POSITIVO

NEGATIVO

NO ME HICIERON EL TEST

¿Le han tenido que repetir el test PCR para Coronavirus COVID-19? *

SI

NO

¿Cuántas veces le han realizado este test?

Ninguna

1

2

3

4

5 ó más

Fecha de realización del ÚLTIMO test para COVID-19

DD **/** MM **/**AAAA

El resultado del ÚLTIMO test para COVID-19 fue...

NEGATIVO

POSITIVO

NO ME HAN HECHO TEST

En caso de ser POSITIVO... (puede marcar varias)

No precisé valoración médica

Precisé atención médica por teléfono

Precisé atención médica presencial

Precisé acudir a urgencias

Precisé ingreso en planta de hospital

Precisé ingreso en UCI

En los últimos 14 días...

ha tenido contacto con PACIENTES CON TEST DE COVID-19 POSITIVO?

ha tenido contacto con PACIENTES CON SÍNTOMAS DE INFECCIÓN POR COVID-19 (tos, fiebre, dificultad respiratoria)?

NO HE TENIDO CONTACTO CON NINGUNO DE LOS ANTERIORES

NO LO SÉ

Este contacto ha sido

Estrecho (varias hs al día, convivientes, sanitarios, cuidadores...)

Puntual (15-30', con mascarilla y sin aerosoles... )
